# Supplementary material for: The PARP1 Inhibitor AZD5305 Impairs Ovarian Adenocarcinoma Progression and Visceral Metastases in Patient-derived Xenografts Alone and in Combination with Carboplatin
Source: PubMed Central journal article supplement (PMC10042207; doi:10.1158/2767-9764.crc-22-0423), 2023-03-27
Supplement: crc-22-0423-s02.pdf [file crc-22-0423-s02.pdf]

**A HOC106**  
*BRCA1* mut

- Vehicle
- CPT 20mg/kg
- CPT 35mg/kg
- OLA 100mg/kg

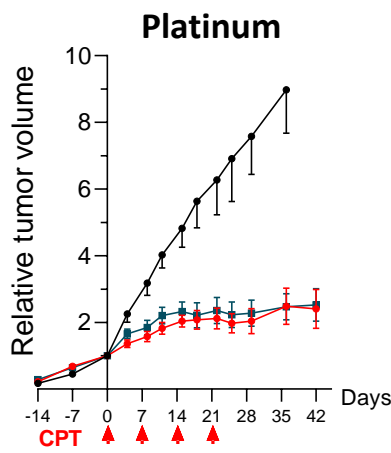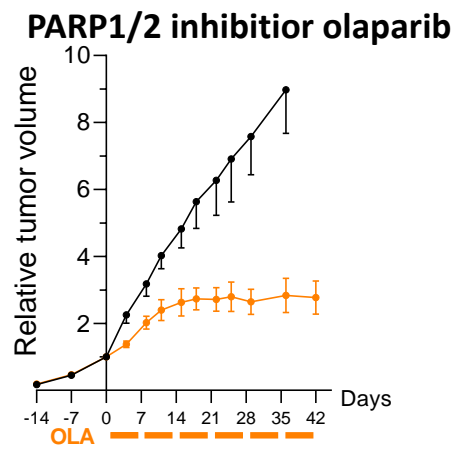

**B HOC107**  
*BRCA1* mut

- Vehicle
- CPT 20mg/kg
- CPT 35mg/kg
- OLA 100mg/kg

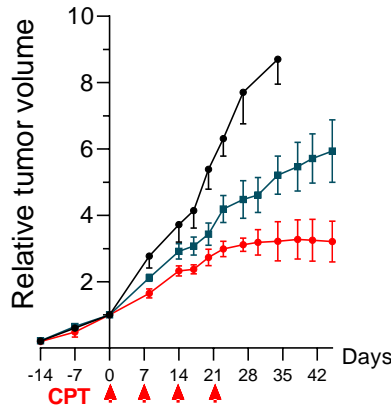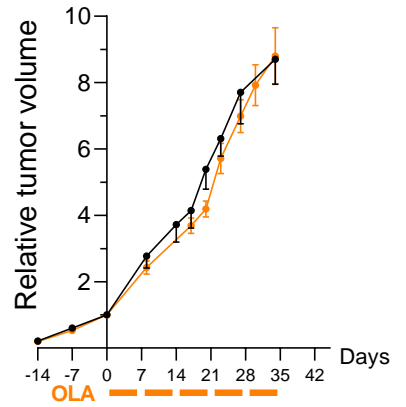

**C HOC84**  
*BRCA1* wt

- Vehicle
- CPT 35mg/kg
- CPT 50mg/kg
- OLA 100mg/kg

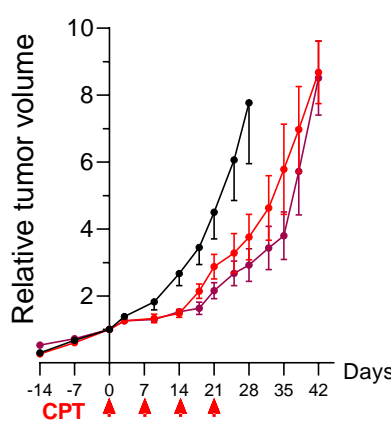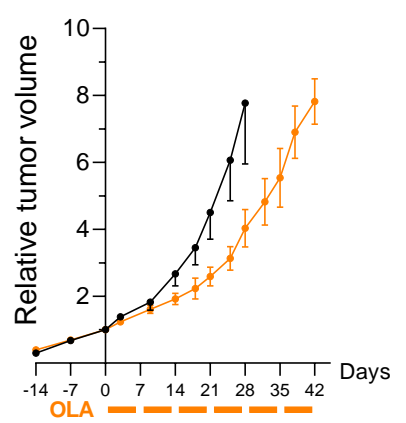

**D HOC22**  
*BRCA1* mut

- Vehicle
- DDP 4mg/kg
- CPT 35mg/kg
- OLA 100mg/kg

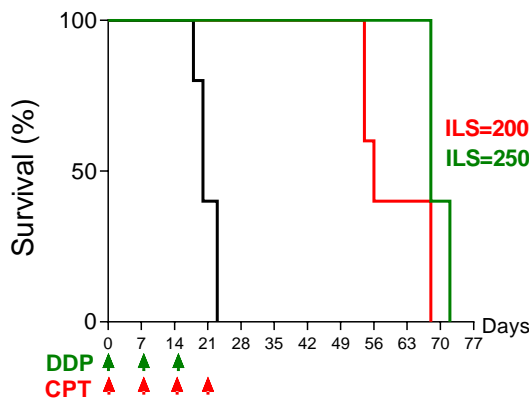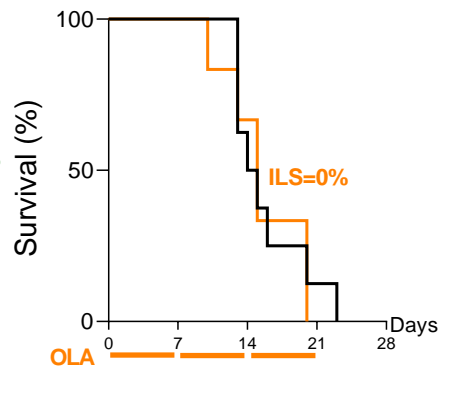

**E HOC520**  
*BRCA1* mut

- Vehicle
- DDP 4mg/kg
- OLA 100mg/kg

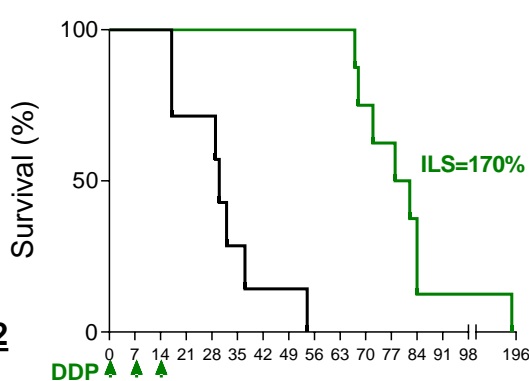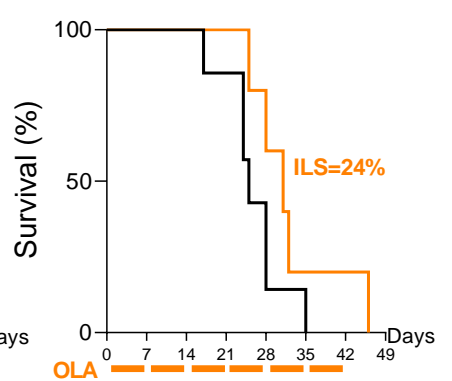

**Supplementary Figure S2**

(see legend on next page)

## Supplementary Figure S2

### Responsiveness of the OC-PDXs to platinum (left) and first-generation dual PARP1/2 inhibitor olaparib (right).

**A-E.** Colored bars and arrows indicate the dosing periods.

Carboplatin (CPT, Sigma-Aldrich) was dissolved in 0.9% NaCl and injected intravenously (iv) once a week for 4 weeks (Q7x4) at the doses of 20, 35 or 50 mg/kg (as indicated).

Cisplatin (DDP, cis-diaminedichloroplatinum, Sigma Aldrich) was dissolved in 0.9% NaCl and injected intravenously (iv) at 4 mg/kg once week for 3 weeks (Q7x3).

Olaparib (OLA, AZD2281, AstraZeneca) was formulated in 10% v/v DMSO in 30% w/v Kleptose (HP- $\beta$ -CD) in sterile MilliQ water and given orally at 100 mg/kg once daily (QD) for 5 days ON and 2 OFF.

**A-C. Anti-tumor activity towards OC-PDXs growing subcutaneously**, presented as relative tumor volume (mean  $\pm$  SEM). Number of mice/group=6-8. HOC106 (*BRCA1m*) is sensitive to both CPT and OLA, and both drugs stalled tumor growth (**A**). HOC107 (*BRCA1m*) is partially sensitive to CPT (with different degrees of response depending on the dose) and resistant to OLA (**B**). HOC84 (*BRCAwt*) is resistant to both CPT and OLA (**C**).

**D-E. Activity towards OC-PDXs growing orthotopically**, presented as Kaplan Meier curves (number of mice/group=6-8). The lifespan increment (ILS% calculated as described in Materials and Methods) of disease-bearing mice is shown. Despite being *BRCA1m*, both HOC22 (**D**) and HOC520 (**E**) are resistant to OLA but sensitive to platinum (DDP or CPT) which significantly prolonged the lifespan of mice.
